# Supplementary material for: Future trends of desalination and wastewater treatment accounting for risks of maladaptation
Source: Research Square preprint supplement (doi:10.21203/rs.3.rs-8681484/v1), 2026-02-10
Supplement: Supplementary file 1 [file b2aecec01d8d08e9845a2b75.docx]

# Supplementary information

Future trends of desalination and wastewater treatment accounting for risks of maladaptation

### Random forest model validation

**Table S1:**

| Test period metrics | Wastewater treatment | Desalination |
| --- | --- | --- |
| R2 | 0.72 | 0.89 |
| MAE | 16.2 (km3/year/capita) | 1.7 (m3/day/capita) |
| RMSE | 21.6 (km3/year/capita) | 2.1 (m3/day/capita) |

Figure SI1: Random Forest model validation for wastewater treatment for a random sample of countries.

Figure SI2: Random Forest model validation for desalination for a random sample of countries.

### Scenario assumptions on technology changes for desalination

Figure SI4: Regional desalination capacities and shares of technologies

Figure SI3: Desalination capacities scaled by their relative size and with proportions of three main groups of technologies.

Figure SI5: Observed historical changes in proportions of desalination technologies.

**Table S2: Assumptions on desalination technology shares under SSP scenarios**

| **Scenario** | **Membrane-based (%)** | **Electrochemical (%)** | **Distillation-based (%)** |
| --- | --- | --- | --- |
| **SSP1** | 95% (Global) by 2050 | 2.5% | 2.5% |
| **SSP2** | 90% HI by 2050  90% LMI by 2080 | 5% (HI and LMI) | 5% (HI and LMI) |
| **SSP3** | 90% (HI) by 2050  70% (LMI) by 2050 | 5% (HI)  15% (LMI) | 5% (HI)  15% (LMI) |
| **SSP4** | 80% (HI) by 2050  50% (LMI) by 2050 | 10% (HI)  25% (LMI) | 10% (HI)  25% (LMI) |
| **SSP5** | 60% (Global) by 2050 | 10% (Global) | 30% (Global) |

Notes: HI = High income (includes Europe, North America, Eurasia, and Asia Pacific); LMI = Low and Middle Income (Africa, Latin America, East Asia, Middle East, South Asia and South-East Asia)

### Energy intensity estimates

**Table S2. Energy intensity (kWh/m³) by desalination technology and feedwater type from Magni et al. (2024)**

| Technology | Feedwater | Low | Mean | High |
| --- | --- | --- | --- | --- |
| Membrane-based | Pure | 0.6 | 1.31 | 2.02 |
| River | 0.63 | 1.38 | 2.11 |
| Wastewater | 0.71 | 1.59 | 2.41 |
| Brackish | 0.8 | 1.8 | 2.71 |
| Seawater | 2.59 | 5.53 | 8.48 |
| Brine | 4.53 | 10.9 | 16.0 |
| Electrochemical | Pure | 0.55 | 0.79 | 1.03 |
| River | 1.03 | 2.23 | 3.43 |
| Wastewater | 2.23 | 6.91 | 11.6 |
| Brackish | 3.43 | 11.6 | 19.8 |
| Seawater | 19.8 | 34.2 | 48.9 |
| Brine | 48.9 | 150.0 | 252.0 |
| Distillation-based | Pure | 14.3 | 16.8 | 19.3 |
| River | 14.3 | 16.8 | 19.3 |
| Wastewater | 14.3 | 16.8 | 19.3 |
| Brackish | 14.3 | 16.8 | 19.3 |
| Seawater | 14.3 | 16.8 | 19.3 |
| Brine | 14.3 | 16.8 | 19.3 |

Values are expressed in kWh per cubic meter of desalinated water. “Low,” “Mean,” and “High” represent estimated ranges from the literature. Distillation-based values are averages computed from multiple technologies (MSF, MED, MVC, etc.).

**Table S4. Energy intensity (kWh/m³) by WWT level from Magni et al. (2024)**

| Treatment level | Unit | Low | Mean | High |
| --- | --- | --- | --- | --- |
| Primary | kWh/m³ | 7.2e-05 | 0.00654 | 0.013 |
| Secondary | kWh/m³ | 0.2 | 0.49 | 0.78 |
| Advanced | kWh/m³ | 0.4 | 0.95 | 1.5 |

Values are expressed in kWh per cubic meter of treated wastewater.

### Shared Socioeconomic Pathways (SSPs)

Shared Socioeconomic Pathways provide a scenario space to explore the range of plausible changes in socioeconomic conditions over the next century. SSPs quantify five different narratives of socioeconomic futures, including dimensions such as population and demographic characteristics, income, urbanization (O’Neill et al. 2017). The five scenarios span different combinations of low to high challenges to adaptation and mitigation, based on the socioeconomic parameters. They are a widely used tool in the climate research community, indispensable for integrated assessments of the dynamics between socioeconomic and climate change variables and are also the scenario framework used in the Sixth Assessment report of the Intergovernmental Panel on Climate Change (IPCC).

SSP1, the ‘sustainability’ scenario, is characterized by low challenges to mitigation and adaptation, a result of increased investments in education, health, renewable energy sources and declining inequalities between and within countries, thus limiting impacts and increasing adaptive capacity. SSP2, the ‘middle of the road’ scenario, maintains premediated challenges to adaptation and mitigation, and is a pathway of uneven and slower socioeconomic progress, compatible with the continuation of historical trends. SSP3 is characterized by high challenges to both mitigation and adaptation, which are a product of a growing divergence between economies, weak international cooperation and increase in internal and international conflicts. SSP4, the scenario of ‘inequality’, leads to low challenges for mitigation, due to technological advancements in high income countries, but high challenges for adaptation, because of an unequal distribution of advancements and resources across countries. Finally, SSP5 is similar to SSP1 in the fast socioeconomic progress on all fronts, but with the major difference of the progress being powered by fossil fuels, which produces substantially higher emissions and resulting climate impacts but assumes low adaptation challenges because of high socioeconomic development.

### Climate forcing data

This analysis uses an indicator of aridity from the ISIMIP 3b model database ensemble of GCM/GHMs from CMIP6 (H08, MIROC-INTEG-LAND, WaterGAP2-2e). The data was downscaled to the grid-scale level and then aggregated to country level with population-weighting for each year. A 5-year rolling window is applied to smooth out variation between individual years and the resulting value is assigned to the middle year.

GCM model runs are forced by the greenhouse gas and radiative forcing trajectories from Representative Concentration Pathways (RCPs). RCPs are scenarios of future greenhouse gas emissions and air pollutants – and therefore of future warming – which are used as inputs to climate models and for assessment of future climate impacts. They are used in conjunction with the SSP scenarios which show the socioeconomic component of the future pathways.

In this analysis we used RCP2.6 (Low Emissions); RCP7.0 and RCP8.5 (High Emissions).

## Mapping of countries and regions

**Table S5: Mapping of countries in the 10 macro regions**

| **Region** | **Country** | **Part of WWT projections** | **Part of desalination projections** | **Region** | **Country** | **Part of WWT projections** | **Part of desalination projections** |
| --- | --- | --- | --- | --- | --- | --- | --- |
| Africa | Algeria | Yes | Yes | Europe | Serbia | Yes | Yes |
| Africa | Botswana | Yes | Yes | Europe | Slovenia | Yes | Yes |
| Africa | Egypt | Yes | Yes | Europe | Spain | Yes | Yes |
| Africa | Ethiopia | Yes | Yes | Europe | Sweden | Yes | Yes |
| Africa | Ghana | Yes | Yes | Europe | Switzerland | Yes | Yes |
| Africa | Kenya | Yes | Yes | Europe | Turkey | Yes | Yes |
| Africa | Libya | Yes | Yes | Europe | United Kingdom | Yes | Yes |
| Africa | Mauritania | Yes | Yes | Europe | Andorra | No | No |
| Africa | Morocco | Yes | Yes | Europe | Belgium | Yes | Yes |
| Africa | South Africa | Yes | Yes | Europe | Bosnia & Herzegovina | No | No |
| Africa | Tunisia | Yes | Yes | Europe | Estonia | No | No |
| Africa | Zimbabwe | Yes | Yes | Europe | Lithuania | No | No |
| Africa | Angola | Yes | Yes | Europe | Luxembourg | Yes | Yes |
| Africa | Burundi | No | No | Europe | Latvia | Yes | Yes |
| Africa | Benin | No | No | Europe | North Macedonia | No | No |
| Africa | Burkina Faso | No | No | Europe | Montenegro | No | No |
| Africa | Central African Republic | No | No | Europe | Norway | Yes | Yes |
| Africa | C√¥te d‚ÄôIvoire | No | No | Europe | San Marino | No | No |
| Africa | Cameroon | No | No | Europe | Slovakia | Yes | Yes |
| Africa | Congo - Kinshasa | Yes | Yes | Latin America and Caribbean | Argentina | Yes | Yes |
| Africa | Congo - Brazzaville | Yes | Yes | Latin America and Caribbean | Brazil | Yes | Yes |
| Africa | Djibouti | Yes | Yes | Latin America and Caribbean | Chile | Yes | Yes |
| Africa | Eritrea | Yes | Yes | Latin America and Caribbean | Colombia | Yes | Yes |
| Africa | Gabon | Yes | Yes | Latin America and Caribbean | Costa Rica | Yes | Yes |
| Africa | Guinea | Yes | Yes | Latin America and Caribbean | Cuba | Yes | Yes |
| Africa | Gambia | No | No | Latin America and Caribbean | Dominican Republic | Yes | Yes |
| Africa | Lesotho | No | No | Latin America and Caribbean | Ecuador | Yes | Yes |
| Africa | Mali | No | No | Latin America and Caribbean | El Salvador | Yes | Yes |
| Africa | Mozambique | Yes | Yes | Latin America and Caribbean | Honduras | Yes | Yes |
| Africa | Malawi | No | No | Latin America and Caribbean | Mexico | Yes | Yes |
| Africa | Namibia | Yes | Yes | Latin America and Caribbean | Peru | Yes | Yes |
| Africa | Niger | No | No | Latin America and Caribbean | Belize | Yes | Yes |
| Africa | Nigeria | Yes | Yes | Latin America and Caribbean | Bolivia | Yes | Yes |
| Africa | Rwanda | No | No | Latin America and Caribbean | Guatemala | Yes | Yes |
| Africa | Sudan | Yes | Yes | Latin America and Caribbean | French Guiana | No | No |
| Africa | Senegal | Yes | Yes | Latin America and Caribbean | Guyana | No | No |
| Africa | South Sudan | No | No | Latin America and Caribbean | Haiti | Yes | Yes |
| Africa | Eswatini | No | No | Latin America and Caribbean | Jamaica | Yes | Yes |
| Africa | Chad | Yes | Yes | Latin America and Caribbean | Nicaragua | Yes | Yes |
| Africa | Togo | No | No | Latin America and Caribbean | Panama | Yes | Yes |
| Africa | Tanzania | Yes | Yes | Latin America and Caribbean | Puerto Rico | Yes | Yes |
| Africa | Uganda | No | No | Latin America and Caribbean | Paraguay | Yes | Yes |
| Africa | Zambia | Yes | Yes | Latin America and Caribbean | Suriname | Yes | Yes |
| Asia-Pacific Developed | Australia | Yes | Yes | Latin America and Caribbean | Trinidad & Tobago | Yes | Yes |
| Asia-Pacific Developed | Japan | Yes | Yes | Latin America and Caribbean | Uruguay | Yes | Yes |
| Asia-Pacific Developed | New Zealand | Yes | Yes | Latin America and Caribbean | Venezuela | No | No |
| Eastern Asia | China | Yes | Yes | Latin America and Caribbean | U.S. Virgin Islands | No | No |
| Eastern Asia | South Korea | Yes | Yes | Middle East | Bahrain | Yes | Yes |
| Eastern Asia | Mongolia | No | No | Middle East | Iran | Yes | Yes |
| Eastern Asia | North Korea | No | No | Middle East | Iraq | Yes | Yes |
| Eastern Asia | Taiwan | Yes | Yes | Middle East | Israel | Yes | Yes |
| Eurasia | Belarus | Yes | Yes | Middle East | Jordan | Yes | Yes |
| Eurasia | Georgia | Yes | Yes | Middle East | Lebanon | Yes | Yes |
| Eurasia | Kazakhstan | Yes | Yes | Middle East | Oman | Yes | Yes |
| Eurasia | Russia | Yes | Yes | Middle East | Qatar | Yes | Yes |
| Eurasia | Tajikistan | Yes | Yes | Middle East | Saudi Arabia | Yes | Yes |
| Eurasia | Turkmenistan | Yes | Yes | Middle East | United Arab Emirates | Yes | Yes |
| Eurasia | Ukraine | Yes | Yes | Middle East | Yemen | Yes | Yes |
| Eurasia | Armenia | No | No | Middle East | Kuwait | No | No |
| Eurasia | Azerbaijan | Yes | Yes | Middle East | Palestinian Territories | No | No |
| Eurasia | Kyrgyzstan | No | No | Middle East | Syria | No | No |
| Eurasia | Moldova | Yes | Yes | North America | Canada | Yes | Yes |
| Eurasia | Uzbekistan | Yes | Yes | North America | United States | Yes | Yes |
| Europe | Albania | Yes | Yes | South-East Asia and developing Pacific | Cambodia | Yes | Yes |
| Europe | Austria | Yes | Yes | South-East Asia and developing Pacific | Malaysia | Yes | Yes |
| Europe | Bulgaria | Yes | Yes | South-East Asia and developing Pacific | Thailand | Yes | Yes |
| Europe | Croatia | Yes | Yes | South-East Asia and developing Pacific | Vietnam | Yes | Yes |
| Europe | Cyprus | Yes | Yes | South-East Asia and developing Pacific | Brunei | No | No |
| Europe | Czechia | Yes | Yes | South-East Asia and developing Pacific | Fiji | Yes | Yes |
| Europe | Denmark | Yes | Yes | South-East Asia and developing Pacific | Indonesia | Yes | Yes |
| Europe | Finland | Yes | Yes | South-East Asia and developing Pacific | Laos | No | No |
| Europe | France | Yes | Yes | South-East Asia and developing Pacific | Myanmar (Burma) | Yes | Yes |
| Europe | Germany | Yes | Yes | South-East Asia and developing Pacific | Philippines | Yes | Yes |
| Europe | Greece | Yes | Yes | South-East Asia and developing Pacific | Timor-Leste | No | No |
| Europe | Hungary | Yes | Yes | Southern Asia | India | Yes | Yes |
| Europe | Ireland | Yes | Yes | Southern Asia | Pakistan | Yes | Yes |
| Europe | Italy | Yes | Yes | Southern Asia | Afghanistan | No | No |
| Europe | Malta | Yes | Yes | Southern Asia | Bangladesh | Yes | Yes |
| Europe | Netherlands | Yes | Yes | Southern Asia | Bhutan | No | No |
| Europe | Poland | Yes | Yes | Southern Asia | Sri Lanka | Yes | Yes |
| Europe | Portugal | Yes | Yes | Southern Asia | Nepal | No | No |
| Europe | Romania | Yes | Yes |  |  |  |  |
